# Supplementary material for: Pathogenesis of Raynaud's phenomenon
Source: Oxford University Press journal article supplement (doi:10.1093/rheumatology/keh552), 2005-03-01
Supplement: keh552_Supplementary_Data.zip [file keh552_Supplementary_Data.zip]

Archive with 1 entries (1 files):
- Keh552_figure_two_colour.pdf
