# Supplementary figures and images for: Pathogenesis of Raynaud's phenomenon
Source: Oxford University Press journal article supplement (doi:10.1093/rheumatology/keh552), 2005-03-01

Figure 2

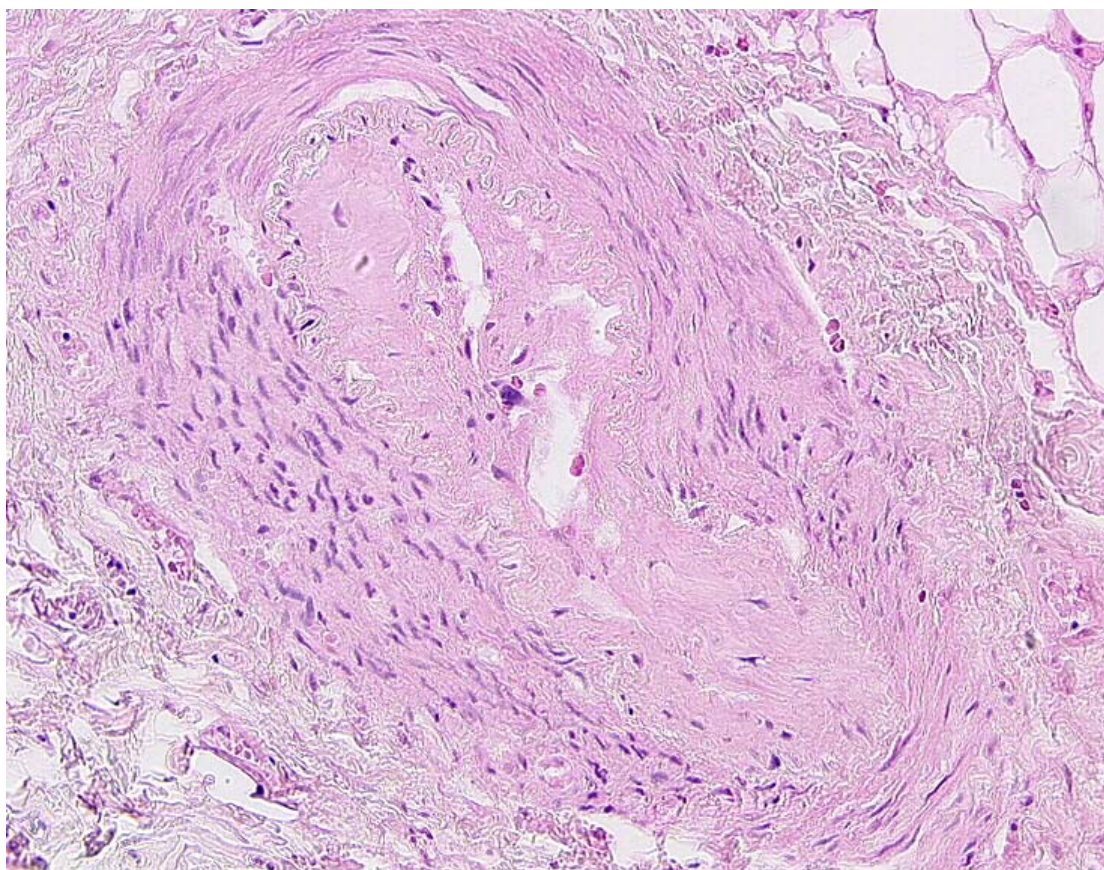

Supplement: keh552_Supplementary_Data.zip [file keh552_Supplementary_Data.zip › Keh552_figure_two_colour.pdf]
